# Supplementary material for: Lithiated carbon cloth as a dendrite-free anode for high-performance lithium batteries
Source: Royal Society of Chemistry journal article supplement (doi:10.1039/d0se01096k), 2020-01-01
Supplement: d0se01096k1.pdf [file d0se01096k1.pdf]

# Supporting Information

## Lithiated carbon cloth as dendrite-free anode for high-performance lithium battery

Hao Cheng,<sup>‡a</sup> Shiyun Zhang,<sup>‡a</sup> Jian Mei,<sup>b</sup> Lvchao Qiu,<sup>b</sup> Peng Zhang,<sup>c</sup> Xiongwen Xu,<sup>d</sup> Jian Tu,<sup>d</sup>

Jian Xie<sup>\*ae</sup> and Xinbing Zhao<sup>ae</sup>

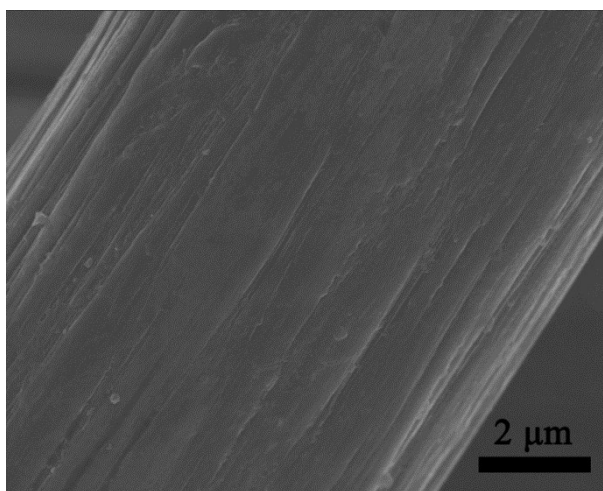

**Fig. S1.** SEM image of a single carbon fiber in carbon cloth.

<sup>a</sup>State Key Laboratory of Silicon Materials, School of Materials Science and Engineering, Zhejiang University, Hangzhou 310027, P. R. China. E-mail: xiejian1977@zju.edu.cn; Fax: +86-571-87951451; Tel: +86-571-87951451

<sup>b</sup>State Grid Zhejiang Electric Power Research Institute, Hangzhou 310014, P. R. China

<sup>c</sup>Hangzhou Skyrich Power Co., Ltd., Hangzhou 310022, P. R. China

<sup>d</sup>LI-FUN Technology Co., Ltd., Zhuzhou 412000, P. R. China

<sup>e</sup>Key Laboratory of Advanced Materials and Applications for Batteries of Zhejiang Province, Hangzhou 310027, P. R. China

<sup>‡</sup>Hao Cheng and Shiyun Zhang contributed equally to this work.

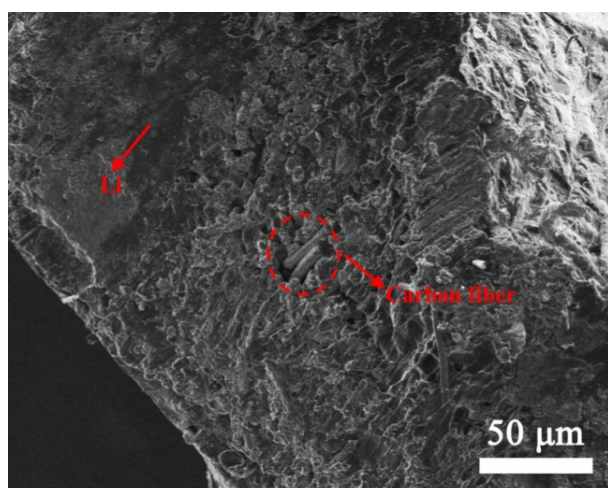

**Fig. S2.** Cross-section SEM image of the LCC electrodes.

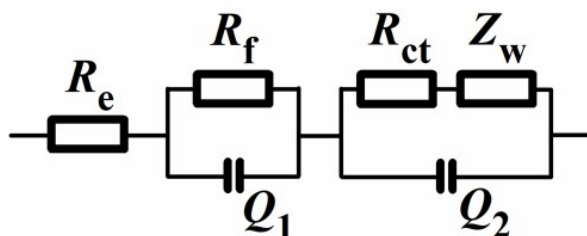

**Fig. S3.** Equivalent circuit for the fitting of the electrochemical impedance, where  $R_e$  represents ohm resistance of cell components,  $R_f$  and  $Q_1$  correspond to the surface film resistance and relaxation capacitance,  $R_{ct}$  and  $Q_2$  correspond to the charge transfer resistance and double-layer capacitance, and  $Z_w$  is related to the bulk diffusion of Li ions.

**Table S1** Fitting results of the Nyquist plots in Fig. 2 using the equivalent circuit in Fig. S3.

| Sample           | $R_e(\Omega)$ | $R_f(\Omega)$ | $R_{ct}(\Omega)$ |
|------------------|---------------|---------------|------------------|
| LCC, 0 h         | 9.7           | 134.6         | 121.0            |
| LCC, 50 h        | 3.5           | 370.6         | 259.1            |
| LCC, 100 h       | 3.0           | 352.1         | 325.2            |
| LCC, 1st cycle   | 12.2          | 38.5          | 7.3              |
| LCC, 100th cycle | 6.5           | 87.0          | 8.6              |
| Li, 0 h          | 3.0           | 198.1         | 104.6            |
| Li, 50 h         | 3.2           | 395.4         | 179.3            |
| Li, 100 h        | 5.5           | 554.7         | 335.8            |
| Li, 1st cycle    | 3.5           | 82.6          | 23.8             |
| Li, 100th cycle  | 4.9           | 169.4         | 37.2             |

**Table S2** Comparison of load mass fraction of Li in different carbon-based Li composite anodes.

| Sample      | Mass fraction of Li | References       |
|-------------|---------------------|------------------|
| CF/Ag-Li    | 40.7%               | 1                |
| Li-CF       | 37%                 | 2                |
| Graphene-Li | 67.9%               | 3                |
| <b>LCC</b>  | <b>61%</b>          | <b>This work</b> |

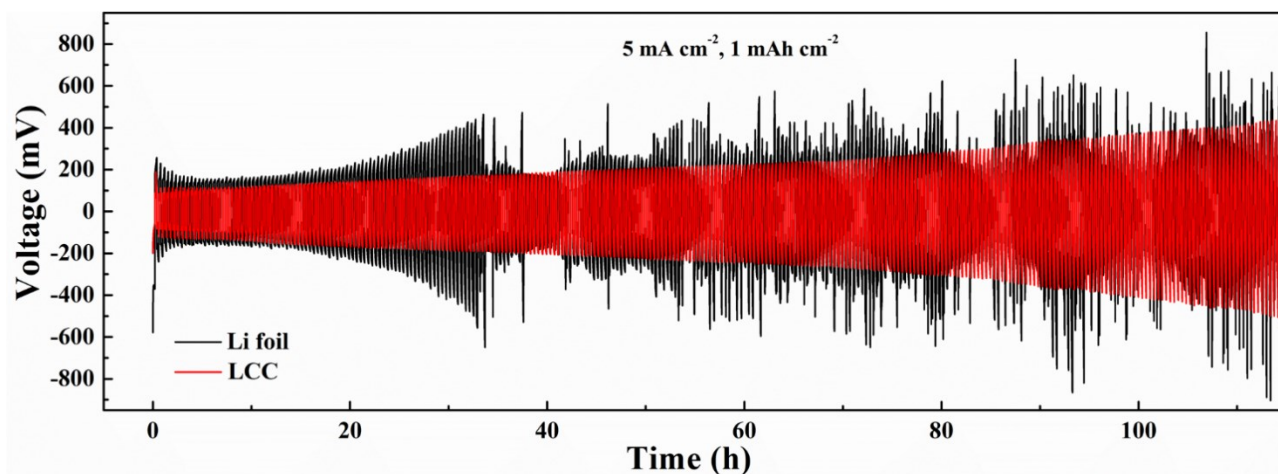

**Fig. S4.** Galvanostatic discharge/charge profiles of Li and LCC electrodes in symmetric cells at  $5 \text{ mA cm}^{-2}$  with a capacity of  $1 \text{ mAh cm}^{-2}$ .

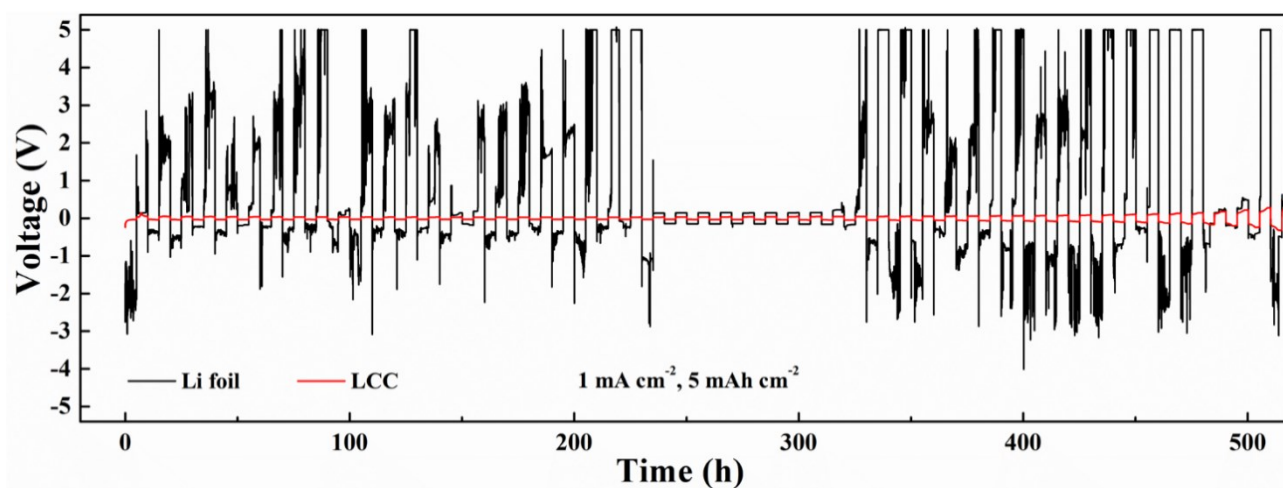

**Fig. S5.** Galvanostatic discharge/charge profiles of Li and LCC electrodes in symmetric cells at  $1 \text{ mA cm}^{-2}$  with a capacity of  $5 \text{ mAh cm}^{-2}$ .

**Table S3** Performance comparison of different 3-D carbon hosts for Li metal anodes.

| Sample      | Current density<br>(mA cm <sup>-2</sup> ) | Capacity<br>(mAh cm <sup>-2</sup> ) | Cycling time<br>(h) | References       |
|-------------|-------------------------------------------|-------------------------------------|---------------------|------------------|
| CF/Ag-Li    | 1                                         | 1                                   | 400                 | 1                |
| Li-CF       | 3                                         | 1                                   | 120                 | 2                |
| Graphene-Li | 1                                         | 1                                   | 330                 | 3                |
| rGO-Li      | 1                                         | 1                                   | 500                 | 4                |
| Li-CNTs     | 3                                         | 1                                   | 70                  | 5                |
| LiCNE       | 1                                         | 1                                   | 100                 | 6                |
| Li-CMN      | 1                                         | 1                                   | 200                 | 7                |
| <b>LCC</b>  | <b>1</b>                                  | <b>1</b>                            | <b>700</b>          | <b>This work</b> |
|             | <b>3</b>                                  | <b>1</b>                            | <b>300</b>          |                  |

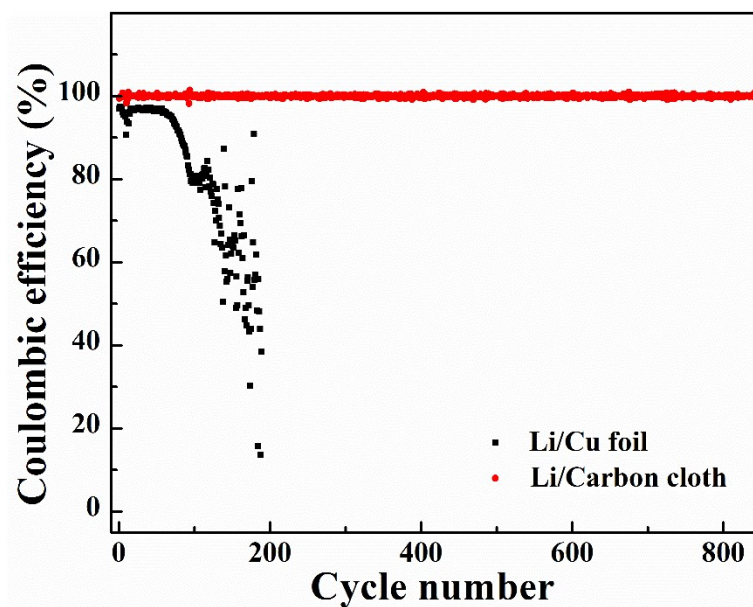

**Fig. S6.** Coulombic efficiency comparison of the Li/Cu cell and Li/carbon cloth cell.

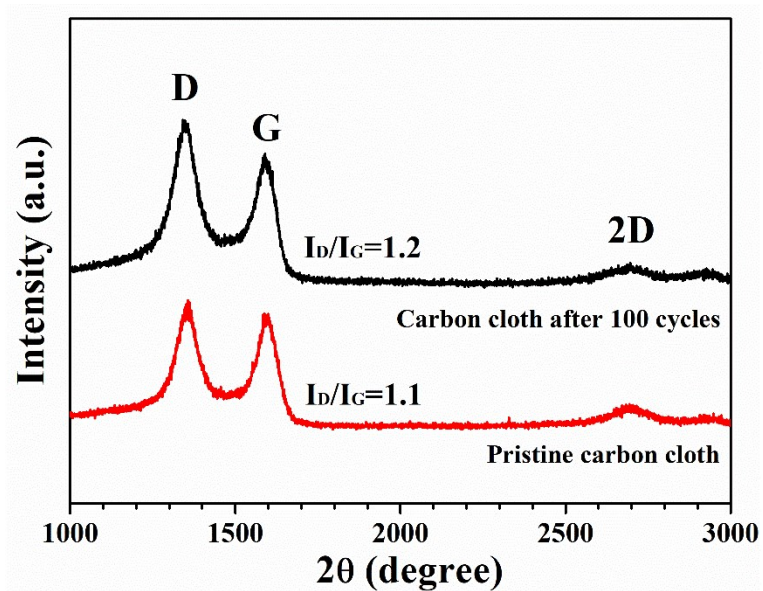

Fig. S7. Raman spectra of the pristine carbon cloth and the carbon cloth after 100 cycles.

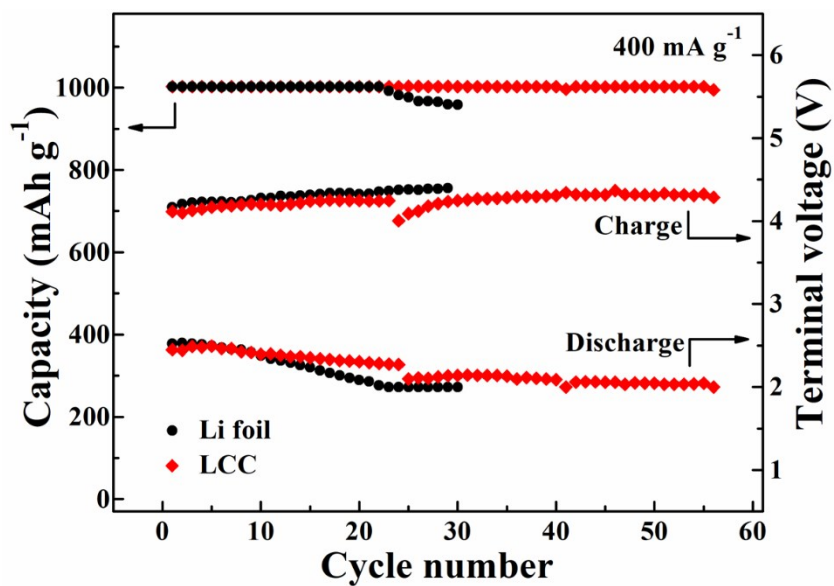

Fig. S8. Cycling performance the Li-O<sub>2</sub> cells using Li or LCC anodes at 400 mA g<sup>-1</sup> with a limited capacity of 1000 mAh g<sup>-1</sup>.

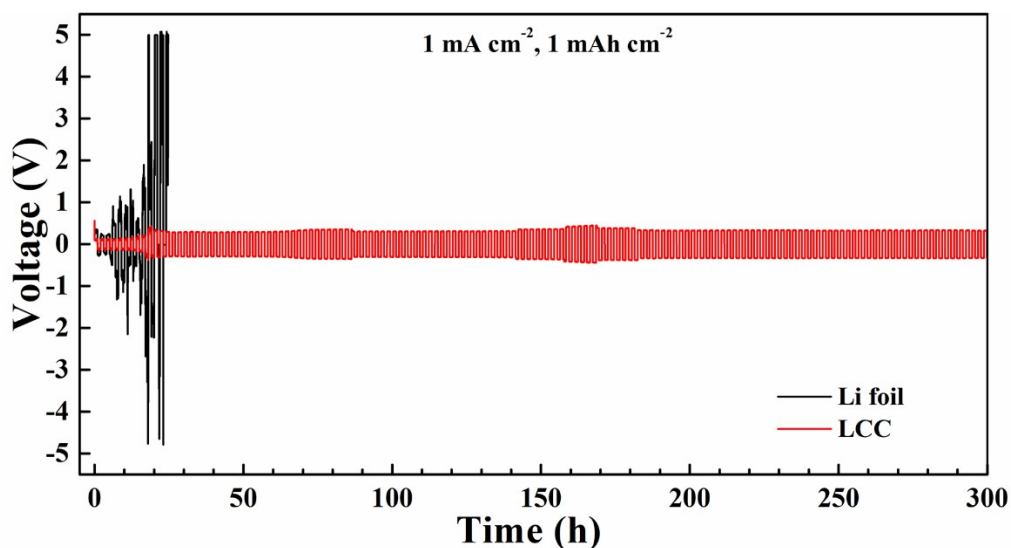

**Fig. S9.** Galvanostatic discharge/charge profiles of Li and LCC electrodes in symmetric cells with 1 M LiClO<sub>4</sub>/TEGDME electrolyte tested in O<sub>2</sub> atmosphere at 1 mA cm<sup>-2</sup> with a capacity of 1 mAh cm<sup>-2</sup>.

## References

- 1 R. Zhang, X. Chen, X. Shen, X. Q. Zhang, X. R. Chen, X. B. Cheng, C. Yan, C. Z. Zhao and Q. Zhang, *Joule*, 2018, **2**, 764–777.
- 2 Y. Zhang, C. W. Wang, G. Pastel, Y. D. Kuang, H. Xie, Y. J. Li, B. Y. Liu, W. Luo, C. J. Chen and L. B. Hu, *Adv. Energy Mater.*, 2018, **8**, 1800635.
- 3 G. Huang, J. H. Han, F. Zhang, Z. Q. Wang, H. Kashani, K. Watanabe and M. W. Chen, *Adv. Mater.*, 2018, **31**, 1805334.
- 4 D. C. Lin, Y. Y. Liu, Z. Liang, H. W. Lee, J. Sun, H. T. Wang, K. Yan, J. Xie and Y. Cui, *Nat. Nanotechnol.*, 2016, **11**, 626–632.
- 5 J. L. Lang, Y. Jin, X. Y. Luo, Z. L. Liu, J. N. Song, Y. Z. Long, L. H. Qi, M. H. Fang, Z. C. Li and H. Wu, *J. Mater. Chem. A*, 2017, **5**, 19168–19174.
- 6 D. C. Lin, J. Zhao, J. Sun, H. B. Yao, Y. Y. Liu, K. Yan and Y. Cui, *PNAS*, 2017, **114**, 4613–4618.
- 7 H. Ye, S. Xin, Y. X. Yin, J. Y. Li, Y. G. Guo and L. J. Wan, *J. Am. Chem. Soc.*, 2017, **139**, 5916–5922.

## **Information for videos**

**Video S1** Fabrication process of the LCC electrode.

**Video S2** Dynamic changes of the Li electrode at  $1 \text{ mA cm}^{-2}$  at 100 times speed.

**Video S3** Dynamic changes of the LCC electrode at  $1 \text{ mA cm}^{-2}$  at 100 times speed.
